# Supplementary material
Source: publisher figshare collection journal article supplement (https://tandf.figshare.com/ndownloader/files/19093112)
Supplement: Supplementary file 1 [file 19093112]

| Table 8                                                       |                                                  | Thematic and Gain Component Tabulation          |                                                                             |      |                                  |      |             |      |
|---------------------------------------------------------------|--------------------------------------------------|-------------------------------------------------|-----------------------------------------------------------------------------|------|----------------------------------|------|-------------|------|
| Thematic Analysis                                             |                                                  | Gain Analysis by Theme                          |                                                                             |      |                                  |      |             |      |
| Primary Theme<br>(PEG, PPG, CEG)<br>(N)<br>[%]                | Secondary Theme<br>(PEG, PPG, CEG)<br>(N)<br>[%] | Gain Component:                                 | PEG<br>N=35                                                                 | %    | PPG<br>N=45                      | %    | CEG<br>N=11 | %    |
| Perspective Improvements<br>(26, 26, 5)<br>[0.74, 0.58, 0.45] | Self<br>(8, 5, 0)<br>[0.23, 0.11, 0.0]           | Personal Introspection                          | 2, 3, 7, 31, 34                                                             | 0.14 | 9, 16, 26,                       | 0.07 |             | 0.0  |
|                                                               |                                                  | Professional Introspection                      | 1, 7, 16, 20, 34                                                            | 0.14 | 6, 45                            | 0.04 |             | 0.0  |
|                                                               | Environmental<br>(7, 11, 2)<br>[0.2, 0.24, 0.18] | Medical School Experience Processing/Reflection | 1, 8, 11, 16, 17, 18, 20,                                                   | 0.2  | 2, 7, 9, 10, 12, 13, 16, 22, 23  | 0.2  | 8, 10       | 0.18 |
|                                                               |                                                  | Life Experience Processing/Reflection           |                                                                             | 0.0  | 9, 22, 26, 27                    | 0.09 | 8, 10       | 0.18 |
|                                                               | Insight<br>(22, 9, 4)<br>[0.63, 0.2,             | Insight to Peer Experiences                     | 2, 3, 5, 6, 7, 8, 9, 10, 11, 12, 13, 14, 15, 16, 17, 18, 19, 25, 26, 28, 31 | 0.6  | 6, 9, 16, 22, 26, 32, 35, 37, 44 | 0.2  | 3, 4, 5, 8  | 0.36 |

|  |                                                  |                                            |                                                      |      |                                                                        |      |                |      |
|--|--------------------------------------------------|--------------------------------------------|------------------------------------------------------|------|------------------------------------------------------------------------|------|----------------|------|
|  | 0.36]                                            | Insight to Extra-Personal Receptiveness    | 32                                                   | 0.02 |                                                                        | 0.0  |                | 0.0  |
|  |                                                  | Insight to Personal Communicative Process  | 32                                                   | 0.02 |                                                                        | 0.0  |                | 0.0  |
|  | Comparative<br>(10, 11, 1)<br>[0.29, 0.24, 0.09] | Comparisons of Respective Peer Experiences | 2, 4, 5, 6, 13, 18, 25,                              | 0.2  | 1, 3, 4, 5, 6, 7, 19, 26                                               | 0.18 | 5              | 0.09 |
|  |                                                  | Comparisons of Respective Peer Values      | 34                                                   | 0.03 |                                                                        | 0.0  |                | 0.0  |
|  |                                                  | Experiential Familiarity                   | 24, 27                                               | 0.06 | 6, 5, 4, 3, 7, 19, 21, 24, 36                                          | 0.2  | 5              | 0.09 |
|  | Alterative<br>(5, 5, 0)<br>[0.14, 0.11, 0.0]     | Improved Life-Perspective                  | 6, 9, 15                                             | 0.09 | 2, 4, 7, 26                                                            | 0.09 |                | 0.0  |
|  |                                                  | Altered Gender Perspectives                |                                                      | 0.0  | 14                                                                     | 0.02 |                | 0.0  |
|  |                                                  | Respect for Peers                          | 26                                                   | 0.03 |                                                                        | 0.0  |                | 0.0  |
|  |                                                  | Confidence in Peers                        | 17                                                   | 0.03 |                                                                        | 0.0  |                | 0.0  |
|  | Community Improvements                           | Connective<br>(15, 19, 6)<br>[0.43, 0.42,  | 2, 3, 4, 5, 6, 8, 10, 12, 14, 19, 22, 23, 27, 33, 35 | 0.43 | 1, 2, 5, 8, 10, 15, 17, 18, 21, 22, 25, 28, 29, 30, 33, 36, 39, 41, 42 | 0.42 | 1, 2, 3, 5, 11 | 0.45 |

|                                                      |                                         |                                                      |               |      |               |      |   |      |
|------------------------------------------------------|-----------------------------------------|------------------------------------------------------|---------------|------|---------------|------|---|------|
| (17, 20, 6)<br>[0.49, 0.44, 0.54]                    | 0.55]                                   | Genuine Human Connection                             |               | 0.0  | 1, 2, 17, 25  | 0.09 | 7 | 0.09 |
|                                                      |                                         | Professional Connection                              |               | 0.0  | 28            | 0.02 |   | 0.0  |
|                                                      | Communicative (2, 3, 0)                 | Thoughtful Peer Conversation                         | 20, 21        | 0.0  | 2, 10,        | 0.04 |   | 0.0  |
|                                                      | [0.06, 0.07, 0.0]                       | Inspiration from Peers                               |               | 0.06 | 2, 6          | 0.04 |   | 0.0  |
| Personal Improvements<br>(8, 2, 0)<br>[0.3, 0.04, 0] | Skills (6, 2, 0)<br>[0.17, 0.04, 0.0]   | Improved Comfort in Sharing Experiences/Perspectives | 2, 19, 28, 30 | 0.11 | 43            | 0.02 |   | 0.0  |
|                                                      |                                         | Communication Skills Improvement                     | 30, 33        | 0.06 | 11            | 0.02 |   | 0.0  |
|                                                      |                                         | Reflective Writing Skills Improvement                | 32            | 0.03 | 11, 43        | 0.04 |   | 0.0  |
|                                                      | Qualities (2, 0, 0)<br>[0.06, 0.0, 0.0] | Personal Growth                                      | 15            | 0.03 |               | 0.0  |   | 0.0  |
|                                                      |                                         | Open-Mindedness                                      | 15, 29        | 0.06 |               | 0.0  |   | 0.0  |
| Interpersonal                                        | Supportive                              | Opportunity to Receive Peer Support                  | 22, 28, 1     | 0.09 | 2, 12, 18, 38 | 0.09 |   | 0.0  |

|                                                           |                                               |                                               |                        |      |                                    |      |          |      |
|-----------------------------------------------------------|-----------------------------------------------|-----------------------------------------------|------------------------|------|------------------------------------|------|----------|------|
| Components<br>(7, 4, 0)                                   | (6, 4, 0)<br>[0.17, 0.09, 0.0]                | Opportunity to Provide Peer Support           | 1, 3, 7, 21,           | 0.11 | 38                                 | 0.02 |          | 0.0  |
| [0.20, 0.09, 0.0]                                         | Influential<br>(1, 0, 0)<br>[0.03, 0.0, 0.0]  | Opportunity to Positively Influence           | 34                     | 0.03 |                                    | 0.0  |          | 0.0  |
| Intrapersonal Components<br>(6, 10, 4)                    | Primary<br>(0, 0, 1)<br>[0.0, 0.0, 0.09]      | Coping Outlet                                 |                        | 0.0  |                                    | 0.0  | 9        | 0.09 |
| [0.17, 0.22, 0.36]                                        | Secondary<br>(6, 10, 3)<br>[0.17, 0.22, 0.27] | Opportunity to Express Experiences/Challenges | 10, 11, 14, 15, 24, 25 | 0.17 | 1, 3, 5, 8, 13, 15, 19, 20, 25, 34 | 0.22 | 6, 7, 10 | 0.27 |
| Experiential Components<br>(0, 8, 1)<br>[0.0, 0.18, 0.09] | Qualitative<br>(0, 8, 1)<br>[0.0, 0.18, 0.09] | Revealing Experience                          |                        | 0.0  | 3, 4                               | 0.04 |          | 0.0  |
|                                                           |                                               | Novel Pen Pal Experience                      |                        | 0.0  | 1, 11, 13                          | 0.07 |          | 0.0  |
|                                                           |                                               | Enjoyable Experience                          |                        | 0.0  | 1, 3, 19, 24                       | 0.09 | 6        | 0.09 |

|       |                                                 |                       |  |         |        |          |  |         |
|-------|-------------------------------------------------|-----------------------|--|---------|--------|----------|--|---------|
| 0.09] |                                                 | Meditative Experience |  | 0.<br>0 | 23     | 0.<br>02 |  | 0.<br>0 |
|       | Quantitative<br>(0,2, 0)<br>[0.0, 0.04,<br>0.0] | Marginal Gain         |  | 0.<br>0 | 31, 40 | 0.<br>04 |  | 0.<br>0 |

| Table 11                                | ScribeMD Efficacy Triangulation Model   Topic-Objective-Prompt-Question-Factor                         |                                                                                                                                                                                                                                                                                                                                                              |                                                                                                                       |            |
|-----------------------------------------|--------------------------------------------------------------------------------------------------------|--------------------------------------------------------------------------------------------------------------------------------------------------------------------------------------------------------------------------------------------------------------------------------------------------------------------------------------------------------------|-----------------------------------------------------------------------------------------------------------------------|------------|
| Topics                                  | Learning Objective                                                                                     | Program Prompt(s)                                                                                                                                                                                                                                                                                                                                            | Survey Question                                                                                                       | Factor     |
| <i>Professional Identity Formation</i>  | Improve identity formation competencies in the realm of the medical profession's core values.          | -What personal characteristic do you think will make you an authentic healer in your medical career?<br>-Now at the closing of this session of ScribeMD; how do you think this experience has developed your professional identity as a future physician?                                                                                                    | How important do you feel that personal reflection is in medical education?                                           | <b>CMC</b> |
|                                         | Utilize formational competencies to define their role as a student of undergraduate medical education. | Being a medical student is like being a professional learner. What characteristics make a great learner in academia?                                                                                                                                                                                                                                         | How important do you feel that personal reflection is in medical education?                                           | <b>IPR</b> |
|                                         | Form a prospective professional identity in medicine to begin working towards.                         | -What was the primary reason you chose to pursue medicine?<br>-Physicians are often considered the leader of the medical team. What makes a good leader?                                                                                                                                                                                                     | How important do you feel that personal reflection is in medical education?                                           | <b>IPR</b> |
| <i>Narrative Competency Improvement</i> | Improve reflective competencies in respect to the journey through medical education.                   | What has been your biggest obstacle thus far in your medical school experience?                                                                                                                                                                                                                                                                              | How comfortable are you currently with reflective writing?                                                            | <b>CRW</b> |
|                                         | Increase narrative capacity for expressing goals, values, and conflict among peers.                    | - What is a personal characteristic you'd like to improve on this Fall?<br>- In your opening letter, recall a personal characteristic you wanted to improve on. What's something you can do every day to better this personal achievement?<br>- Recall the personal characteristic you wanted to improve on; were you able to? What challenges did you face? | How comfortable are you with starting a conversation with one of your classmates outside of your usual social circle? | <b>CSC</b> |

|                                           |                                                                                                                                                    |                                                                                                                                                                                                                                                                                                                                                                                                                                                                       |                                                                                                                                                                          |                 |
|-------------------------------------------|----------------------------------------------------------------------------------------------------------------------------------------------------|-----------------------------------------------------------------------------------------------------------------------------------------------------------------------------------------------------------------------------------------------------------------------------------------------------------------------------------------------------------------------------------------------------------------------------------------------------------------------|--------------------------------------------------------------------------------------------------------------------------------------------------------------------------|-----------------|
|                                           | Develop a greater understanding of narrative medicine and its importance in medical education and practice.                                        | Medicine can be viewed as a hobby by some. What is a hobby of yours and how might it translate to medicine?                                                                                                                                                                                                                                                                                                                                                           | How important do you feel that personal reflection is in medical education?                                                                                              | <b>IPR</b>      |
| <i>Emotional Intelligence Development</i> | Enhance emotional attunement and empathetic proficiencies through writings with their partner.                                                     | <ul style="list-style-type: none"><li>- Recall a time someone criticized your work; what was your response and did you learn anything from that experience?</li><li>- Healthcare is full of conflict, but it's a healthy part of driving better care. Reflect about a time you had a conflict with a superior in the workplace/education. How did you resolve it?</li><li>- How has your perception of "being wrong" changed since starting medical school?</li></ul> | How comfortable are you with hearing the struggles and successes of others? How comfortable are you currently with anonymously sharing some of your struggles/successes? | <b>HSS, SSS</b> |
|                                           | Improve intra-class interconnectedness and peer-peer comradery through an enhanced understanding of similarities and differences between partners. | What have you learned from your peers in medical school?                                                                                                                                                                                                                                                                                                                                                                                                              | How connected do you feel to your Medical Class as a whole? How connected do you feel to your personal friends within your Medical Class?                                | <b>CMC, CPF</b> |
|                                           | Foster a greater understanding of and yearning for emotional and mental well-being through reflection and peer-peer support.                       | What has your experience been like emotionally with the ScribeMD experience? Were there any powerful moments you can reflect on with your partner?                                                                                                                                                                                                                                                                                                                    | How important do you feel that personal reflection is in medical education?                                                                                              | <b>IPR</b>      |

| <b>Table 12</b>                                    | <b>Gain Component Tabulation</b>                                               |                                                                              |                                                  |
|----------------------------------------------------|--------------------------------------------------------------------------------|------------------------------------------------------------------------------|--------------------------------------------------|
| <b>Gain Component:</b>                             | <b>Participant Expectation of Gain:<br/>N=35</b>                               | <b>Participant Perception of<br/>Gain:<br/>N=46</b>                          | <b>Control Expectation of<br/>Gain:<br/>N=11</b> |
| Personal Introspection                             | 2, 3, 7, 31, 34                                                                | 9, 16, 26,                                                                   |                                                  |
| Professional Introspection                         | 1, 7, 16, 20, 34                                                               | 6, 45                                                                        |                                                  |
| Medical School Experience<br>Processing/Reflection | 1, 8, 11, 16, 17, 18, 20,                                                      | 2, 7, 9, 10, 12, 13, 16, 22, 23                                              | 8, 10                                            |
| Life Experience Processing/Reflection              |                                                                                | 9, 22, 26, 27                                                                | 8, 10                                            |
| Improved Life-Perspective                          | 6, 9, 15                                                                       | 2, 4, 7, 26                                                                  |                                                  |
| Personal Growth                                    | 15                                                                             |                                                                              |                                                  |
| Open-Mindedness                                    | 15, 29                                                                         |                                                                              |                                                  |
| Personal Peer Connection                           | 2, 3, 4, 5, 6, 8, 10, 12, 14, 19, 22, 23, 27,<br>33, 35                        | 1, 2, 5, 8, 10, 15, 17, 18, 21,<br>22, 25, 28, 29, 30, 33, 36, 39,<br>41, 42 | 1, 2, 3, 5, 11                                   |
| Professional Connection                            |                                                                                | 28                                                                           |                                                  |
| Insight to Peer Experiences                        | 2, 3, 5, 6, 7, 8, 9, 10, 11, 12, 13, 14, 15,<br>16, 17, 18, 19, 25, 26, 28, 31 | 6, 9, 16, 22, 26, 32, 35, 37,<br>44                                          | 3, 4, 5, 8                                       |
| Comparisons of Respective Peer Experiences         | 2, 4, 5, 6, 13, 18, 25,                                                        | 1, 3, 4, 5, 6, 7, 19, 26                                                     | 5                                                |



|                                                      |                        |                            |      |
|------------------------------------------------------|------------------------|----------------------------|------|
|                                                      |                        |                            |      |
| Comparisons of Respective Peer Values                | 34                     |                            |      |
| Opportunity to Positively Influence                  | 34                     |                            |      |
| Opportunity to Express Experiences/Challenges        | 10, 11, 14, 15, 24, 25 | 1, 3, 5, 8, 13, 15, 19, 20 | 6, 7 |
| Confidence in Peers                                  | 17                     |                            |      |
| Improved Comfort in Sharing Experiences/Perspectives | 2, 19, 28, 30          | 43                         |      |
| Thoughtful Peer Conversations                        | 20, 21                 | 2, 10,                     |      |
| Opportunity to Receive Peer Support                  | 22, 28, 1              | 2, 12, 18, 38              |      |
| Opportunity to Provide Peer Support                  | 1, 3, 7, 21            | 38                         |      |
| Respect for Peers                                    | 26                     |                            |      |
| Reflective Writing Skills Improvement                | 32                     | 11, 43                     |      |
| Communication Skills Improvement                     | 30, 33                 | 11                         |      |
| Insight to Extra-Personal Receptiveness              | 32                     |                            |      |
| Insight to Personal Communicative Process            | 32                     |                            |      |
| Enjoyable Anonymous Experience                       |                        | 1, 3, 19, 24               | 6    |
| Novel Pen Pal Experience                             |                        | 1, 11, 13                  |      |
| Genuine Human Connection                             |                        | 1, 2, 17, 25               | 7    |

|                             |        |                               |    |
|-----------------------------|--------|-------------------------------|----|
| Inspiration from Peers      |        | 2, 6                          |    |
| Revealing Experience        |        | 3, 4                          |    |
| Experiential Familiarity    | 24, 27 | 6, 5, 4, 3, 7, 19, 21, 24, 36 | 5  |
| Altered Gender Perspectives |        | 14                            |    |
| Meditative Experience       |        | 23                            |    |
| Outlet for Expression       |        | 3, 25, 34                     | 10 |
| Marginal Gain               |        | 31, 40                        |    |
| Coping Outlet               |        |                               | 9  |

|                          |                                                                                                                                                                                                |                                                                                                                                                                          |
|--------------------------|------------------------------------------------------------------------------------------------------------------------------------------------------------------------------------------------|--------------------------------------------------------------------------------------------------------------------------------------------------------------------------|
| Table 13                 | Gain Component and Theme Definitions: Glossary Terms                                                                                                                                           |                                                                                                                                                                          |
| Primary Theme            | Secondary Theme                                                                                                                                                                                | Gain Component:                                                                                                                                                          |
| Perspective Improvements | Self: Views and understandings of self involving introspection, which may involve personal, professional, or other components.                                                                 | Personal Introspection: Examination of one's own conscious thoughts and feelings pertaining to their individual lives respective to individual goals.                    |
|                          |                                                                                                                                                                                                | Professional Introspection: Examination of one's own conscious thoughts and feelings pertaining to their professional lives respective to individual professional goals. |
|                          | Environmental: Views and understandings of one's surroundings, usually involving more than one realm of perspective, in this case being medical school and general life outside of that realm. | Medical School Experience Processing/Reflection: Examination of one's experiences pertinent to their medical school environment.                                         |
|                          |                                                                                                                                                                                                | Life Experience Processing/Reflection: Examination of one's experiences pertinent to their life-environment outside of medical school.                                   |
|                          | Insight: Views and understandings of the perspectives of another person; i.e. a meta-perspective.                                                                                              | Insight to Peer Experiences: An intuitive understanding of the experiences of their partner-peer.                                                                        |
|                          |                                                                                                                                                                                                | Insight to Extra-Personal Receptiveness: An intuitive understanding of how one receives and accepts the experiences of others.                                           |
|                          |                                                                                                                                                                                                | Insight to Personal Communicative Process: An intuitive understanding of one's personal communicative modalities, tendencies, and habits.                                |
|                          | Comparative: Views and understandings stemming from                                                                                                                                            | Comparisons of Respective Peer Experiences: Examination of partner-indicated experiences in contrast or similarity to that of one's own.                                 |

|                        |                                                                                                              |                                                                                                                                                                                                                 |
|------------------------|--------------------------------------------------------------------------------------------------------------|-----------------------------------------------------------------------------------------------------------------------------------------------------------------------------------------------------------------|
|                        | meta-perspectives which involve a direct comparison of two different understandings.                         | Comparisons of Respective Peer Values: Examination of partner-indicated values in contrast or similarity to that of one's own.                                                                                  |
|                        |                                                                                                              | Experiential Familiarity: The phenomenon of realization in which one understands clearly that their experiences are not solely held by themselves, and that others around them often have the same perceptions. |
|                        | Alternative: Views and understandings that are shifted or changed via an experience.                         | Improved Life-Perspective: The positive change in the understanding and perception of one's own life situation.                                                                                                 |
|                        |                                                                                                              | Altered Gender Perspectives: The change in the understanding and perception of a certain gender.                                                                                                                |
|                        |                                                                                                              | Respect for Peers: The change in esteem or reverence for a peer.                                                                                                                                                |
| Community Improvements | Connective: Changes in a community that create connections between individuals and results in more cohesion. | Confidence in Peers: The change in the feeling or belief that one can rely on their peer.                                                                                                                       |
|                        |                                                                                                              | Personal Peer Connection: A unique bond between the peers on an individual level.                                                                                                                               |
|                        |                                                                                                              | Genuine Human Connection: An authentic or sincere bond created between the peers on an individual level.                                                                                                        |
|                        | Communicative: Changes within the peer group that indicate improved exchange of ideas and influence.         | Professional Connection: A medical-profession oriented bond created between the peers on an individual level.                                                                                                   |
|                        |                                                                                                              | Thoughtful Peer Conversation: An exchange between the peers that involved consideration and attention to the conversation.                                                                                      |
|                        |                                                                                                              | Inspiration from Peers: A mental, emotional, or professional stimulation between the peers.                                                                                                                     |

|                          |                                                                                                                                                         |                                                                                                                                                                                                     |
|--------------------------|---------------------------------------------------------------------------------------------------------------------------------------------------------|-----------------------------------------------------------------------------------------------------------------------------------------------------------------------------------------------------|
| Personal Improvements    | Skills: Increases in various abilities respective to the individual, in this case sharing, communication, and reflective writing.                       | Improved Comfort in Sharing Experiences/Perspectives: Increased ease of ability to express one's understandings or experiences to another.                                                          |
|                          |                                                                                                                                                         | Communication Skills Improvement: Increased ease of ability to express one's self effectively.                                                                                                      |
|                          |                                                                                                                                                         | Reflective Writing Skills Improvement: Increased ease of ability to contemplate experiences through writing modalities.                                                                             |
|                          | Qualities: Increases in various descriptors that are favorable to the indicating participant, such as perception of personal growth or open-mindedness. | Personal Growth: Improvement in personal characteristics relative and specific to the indicating participant.                                                                                       |
|                          |                                                                                                                                                         | Open-Mindedness: The unprejudiced ability to consider new ideas, perspectives, etc.                                                                                                                 |
| Interpersonal Components | Supportive: Opportunities to provide or receive support to/from a peer.                                                                                 | Opportunity to Receive Peer Support: An instance to receive emotional, cognitive, or conversational assistance from their peer.                                                                     |
|                          |                                                                                                                                                         | Opportunity to Provide Peer Support: An instance to provide emotional, cognitive, or conversational assistance to their peer.                                                                       |
|                          | Influential: Opportunities to provide or receive influence to/from a peer.                                                                              | Opportunity to Positively Influence: An instance to create a positive change in their peer.                                                                                                         |
| Intrapersonal Components | Primary: Intrapersonal components that do not require a secondary recipient or party for functionality, such as an individual coping mechanism.         | Coping Outlet: An individualized modality used to effectively deal with a cognitive or emotional stress.                                                                                            |
|                          | Secondary: Intrapersonal components that require a                                                                                                      | Opportunity to Express Experiences/Challenges: The method of individual therapy relying solely on the action of expressing their individual perspectives on personal occurrences to another entity. |

|                         |                                                                                                           |                                                                                                                                         |
|-------------------------|-----------------------------------------------------------------------------------------------------------|-----------------------------------------------------------------------------------------------------------------------------------------|
|                         | secondary recipient or party for functionality.                                                           |                                                                                                                                         |
| Experiential Components | Qualitative: Views of an experience that rely on qualitative descriptors by the indicating participant.   | Revealing Experience: An occurrence observed in which something new was later understood by the indicating participant.                 |
|                         |                                                                                                           | Novel Pen Pal Experience: An occurrence observed in comparison to other Pen Pal programs that the participant had previously indicated. |
|                         |                                                                                                           | Enjoyable Experience: A program perception that was associated with a pleasurable experience.                                           |
|                         |                                                                                                           | Meditative Experience: A program perception that was associated with critical thought, focus, and introspection.                        |
|                         | Quantitative: Views of an experience that rely on quantitative descriptors by the indicating participant. | Marginal Gain: A program perception of little to no gain in any of the above mentioned or unmentioned components.                       |
